# Supplementary material for: Superresolution imaging reveals structural features of EB1 in microtubule plus-end tracking
Source: PubMed Central journal article supplement — Mol Biol Cell. 2014 Dec 15;25(25):4166–73. doi: 10.1091/mbc.E14-06-1133 (PMC4263457; doi:10.1091/mbc.e14-06-1133), 2014-12-15

# Supplemental Materials

*Molecular Biology of the Cell*

Xia et al.

## Supplementary Figure Legends

### Figure S1. Atlas of PACF system

Schematic illustration of PACF design and construction maps.

### Figure S2. Characterization of EB1-PACF expression and photoactive properties

**A.** Cell lysates expressing EB1-nPACF (lane 1), EB1-cPACF (lane 2) and co-expressing EB1-n/cPACF (lane 3) were subjected to SDS-PAGE and transferred onto nitrocellulose membrane. Proteins were probed by EB1 antibody.

**B.** Native PAGE gel was stained Coomassie blue. From left to right recombinant PACF and EB1-PACF.

**C.** The Native PAGE gel was first irradiated with a 413 nm light followed by excitation at 488 nm and detected at 530 nm. From left to right recombinant PACF and EB1-PACF.

**D.** Western blot analysis of EB1-PACF using an anti-EB1 mouse antibody (BD Biosciences).

### Figure S3. Analysis of photobleach of EB1-PACF and EB1-PAGFP

**A.** After 24 hrs transfection of EB1-PACF and EB1-PAGFP, cells were scanned with cycles of 488 nm laser. For each cycle, cells were exposed under 100% power 488 nm laser for 50 ms. Photoactivation (PA) was performed with 50% power 405 nm laser for 2 second after the first cycle of 488 nm laser exposure. The scale bars are 5  $\mu$ m.

**B.** Statistics analysis of photobleach of EB1-PACF and EB1-PAGFP, each data point was calculated with more than 100 cells in three independent experiments. The results show that photobleach characters of EB1-PACF and EB1-PAGFP are comparative.

**C.** Schematic drawing of the inducible dimerization construct containing EB1. The C-terminus of EB1 (EBC) was replaced by the homodimerization domain FKBP, which becomes dimerized upon the addition of homodimerizer AP20187.

**D.** Cells expressing the inducible EB1 dimerization system were exposed to 488 nm laser before and after photoactivation with 405 nm laser. AP20187 (100 nM) was utilized to induce the dimerization of

EB1<sup>CH-Linker</sup>-FKBP. Control cells were treated with equal volume of vehicle. The scale bars are 5  $\mu$ m.

E. Statistical analyses of intensity ratios (fluorescent intensity in cells divided by background) in each group illustrated in (D). Data were collected from more than 30 cells from 3 separated experiments.

#### **Figure S4. Statistical analyses of the distribution of localization precisions**

A. The distribution of localization precisions of fixed EB1-PACF proteins (Related to Figure 1E).

B. The distribution of localization precisions of live EB1-PACF and EB1-PAGFP proteins (Related to Figure 1 F and G).

C. The distribution of localization precisions of live EB1-PACF dimerized proteins in every time point (Related to Figure 2).

#### **Figure S5. Real-time imaging of a directional migrating cell**

A. MCF7 cells expressing EB1-eGFP was pretreated with EGF at 30 °C.

B. In-frame images of 5 x15  $\mu$ m rectangular regions of (A) which representing “Trailing Edge (1)”, “Cell Body (2)”, and “Leading edge (3)”, were exhibited with a frame rate of 2 seconds. Note that trailing edge has much less +TIPs comparing with cell body and leading edge, and the +TIPs seems winding but not docking/tracking/catastrophe when touching the cell cortex. Many of +TIPs at leading edge will dock to the pseudopodia, while most of them at cell body keep tracking forward. The arrows point to microtubule plus-ends.

#### **Figure S6. EB1-PACF exhibits different localization patterns at cell body and leading edge**

A. PALM images of EB1-PACF at leading edge from the 100 consecutive exposure frames over time were assembled into two stacks that contains first 50 exposures (snapshot #1-50) and the later 50 exposures (snapshot #51-100). Related to Figure 3C. Bar: 200 nm.

B. PALM images of EB1-PACF at cell body from the 100 exposure frames were separated into 1-50 and 51-100 frames. Related to Figure 3A. Bar: 200 nm.

C. Fixed cells expressing EB1-PACF were co-stained with  $\alpha$ -tubulin antibody. Diffraction limited

TIRFM images of microtubule (indicated by immunofluorescence of alpha-tubulin antibody) were overlaid with PALM images of EB1-PACF. Label “1” refers to plus-end at leading edge, while label “2” refers to plus-end at cell body. Bar: 10  $\mu$ m in image of whole cell; 500 nm in in-frame.

**D.** Fixed cells expressing EB1-PACF were co-stained with EB1 antibody. Diffraction limited TIRFM images of EB1 were overlaid with PALM images of EB1-PACF. Label “1” refers to plus-end at leading edge, while label “2” refers to plus-end at cell body. Bar: 10  $\mu$ m in image of whole cell; 500 nm in in-frame.

**E.** The microtubule plus-ends distribution of EB1-PACF relative to microtubules or EB1 was defined as Type A and Type B as in figure 3E. The percentage of these microtubule plus-ends were plotted for leading edge and cell body. Data were collected from 6 separated experiments with more than 300 plus-ends were analyzed in each group.

### **Figure S7. Sequence alignment of full-length human and mouse EB1 and EB3**

### **Figure S8. Insertion of fluorescent proteins adjacent to the unconserved flexible linker was found to perturb the microtubule plus-end-tracking of EB1**

**A.** Schematic model and the microtubule plus-end-tracking of full-length EB1 with GFP fused in its end. Bar: 10  $\mu$ m.

**B.** Schematic model and the microtubule plus-end-tracking of full-length EB1 with GFP fused between the linker and the EBC (C-terminal domain of EB1). Bar: 10  $\mu$ m.

**C.** Schematic model and the microtubule plus-end-tracking of full-length EB1 with GFP fused between the CH (Calponin homology) domain and the linker. Bar: 10  $\mu$ m.

### **Figure S9. Characterization of the expression of PACF fused EB1 WT/WT, KR5Q/KR5Q and WT/KR5Q by western blot**

Cell lysates expressing PACF fused EB1 WT/WT (lane 1), KR5Q/KR5Q (lane 2), and WT/KR5Q (lane 3) were subjected to SDS-PAGE and transferred onto nitrocellulose membrane (GE Healthcare). Proteins

were probed by an anti-EB1 antibody (BD Bioscience).

**Figure S10. The distribution of localization precisions of dimerized PACF-EB1 proteins (WT/WT, KR5Q/KR5Q, and WT/KR5Q).** (Related to Figure 4B)

**Figure S11. SDS-PAGE analyses of the expression and purification of the FRET sensors** (Relative to Figure 4 D-F).

**Figure S12. Surface charge analysis of EB1 CH and EBC domain**

**A.** Electrostatic surface of EB1 CH domain (PDB 1PA7) is depicted (Red= negatively charged atoms; blue= positively charged atoms; white= no charge).

**B.** Electrostatic surface of EB1 EBC domain (PDB 1WU9) is depicted (Red=negatively charged atoms; blue=positively charged atoms; white=no charge).

Figure S1

A

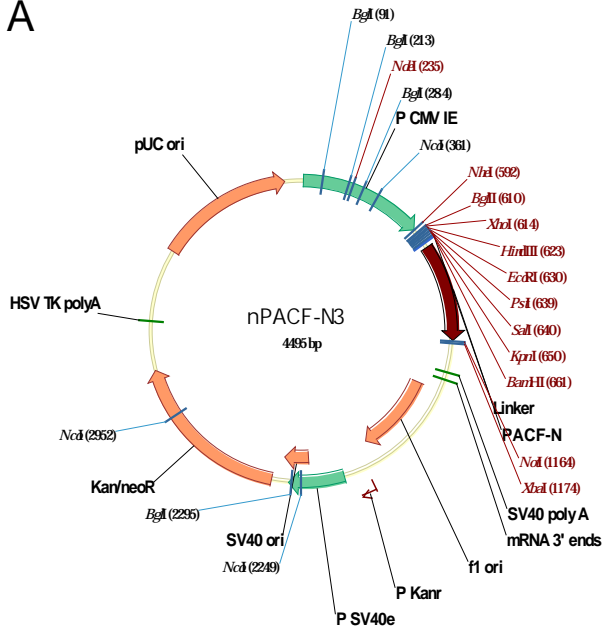

B

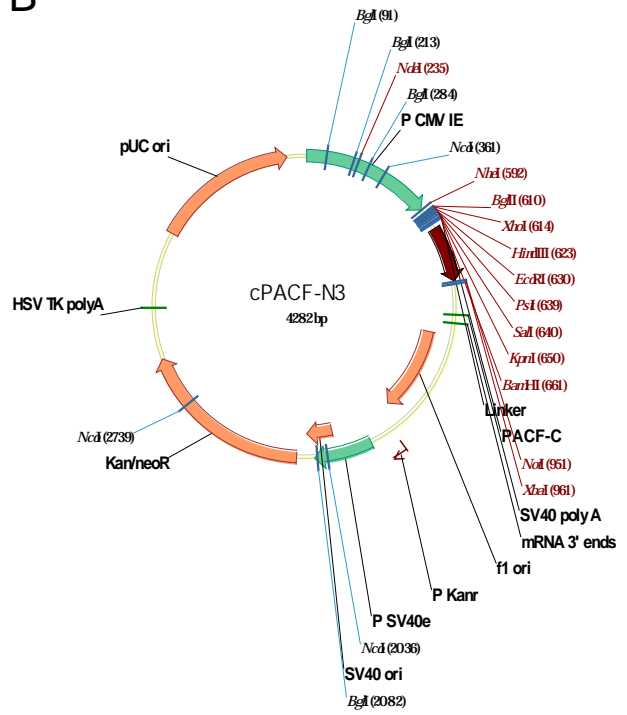

C

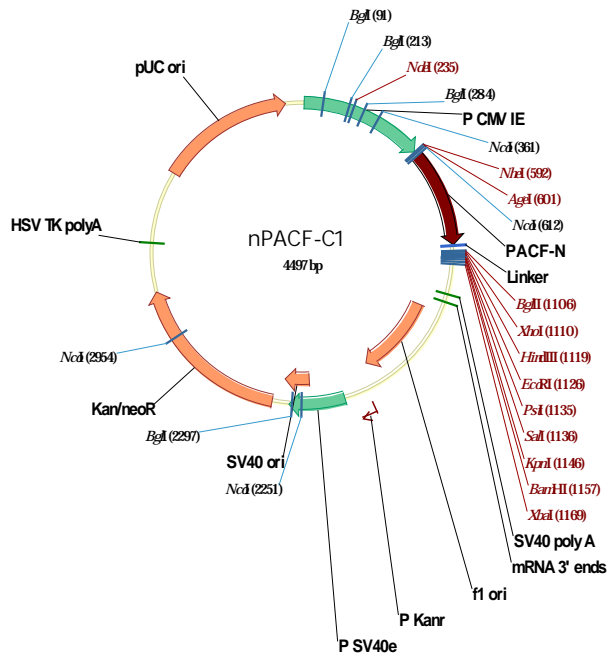

D

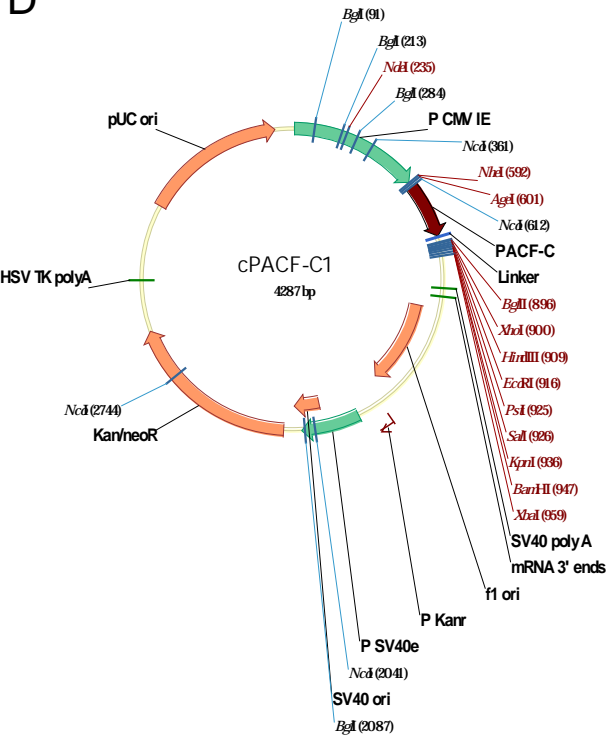

# Figure S2

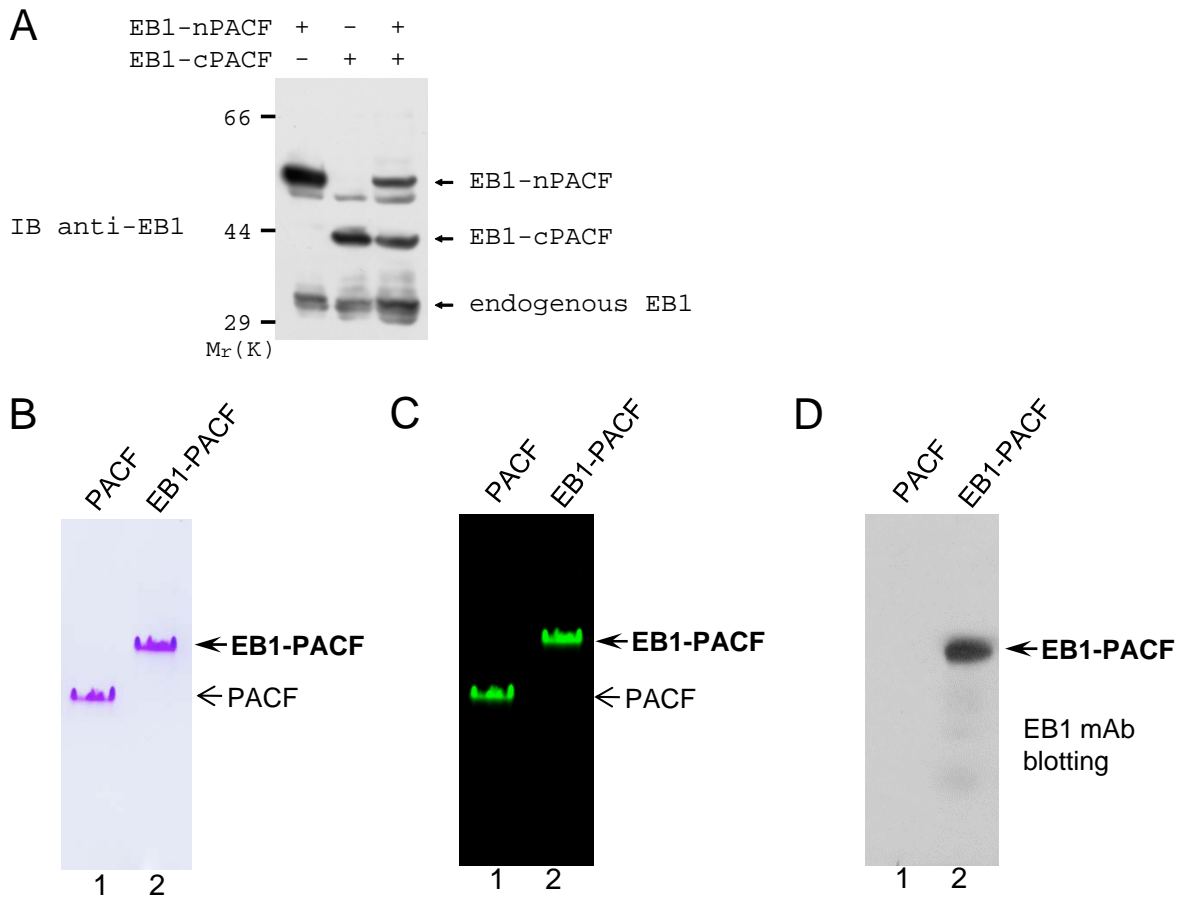

Figure S3

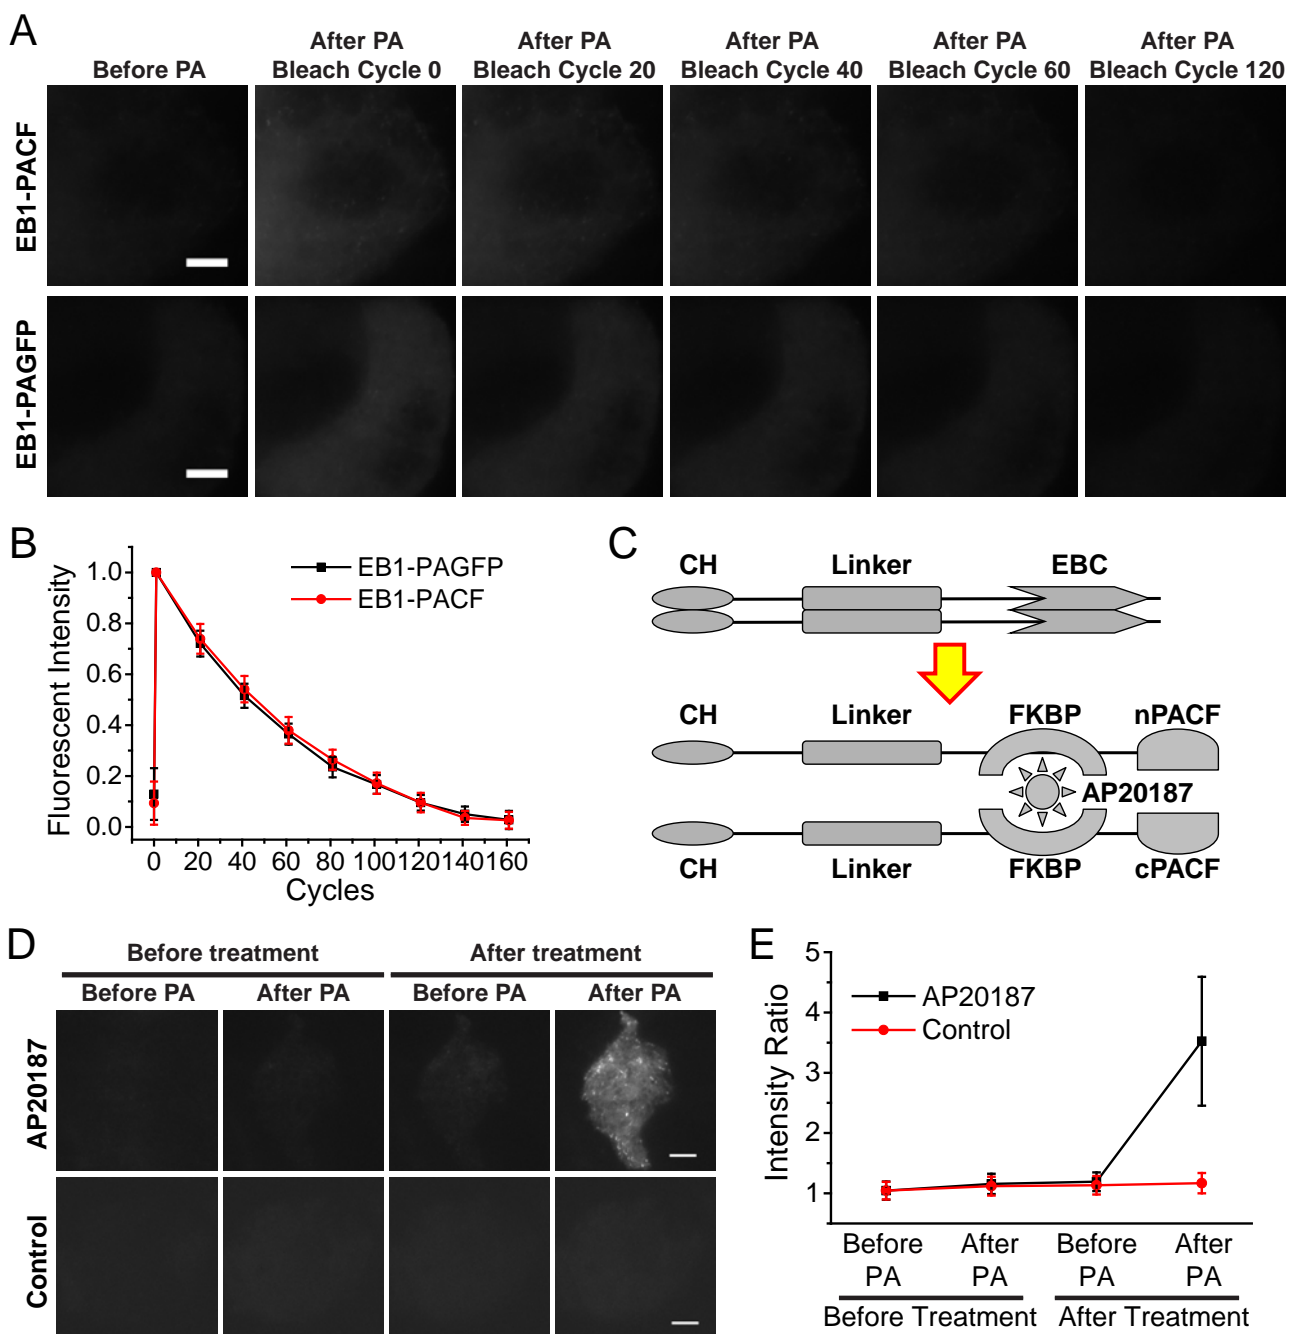



Figure S4

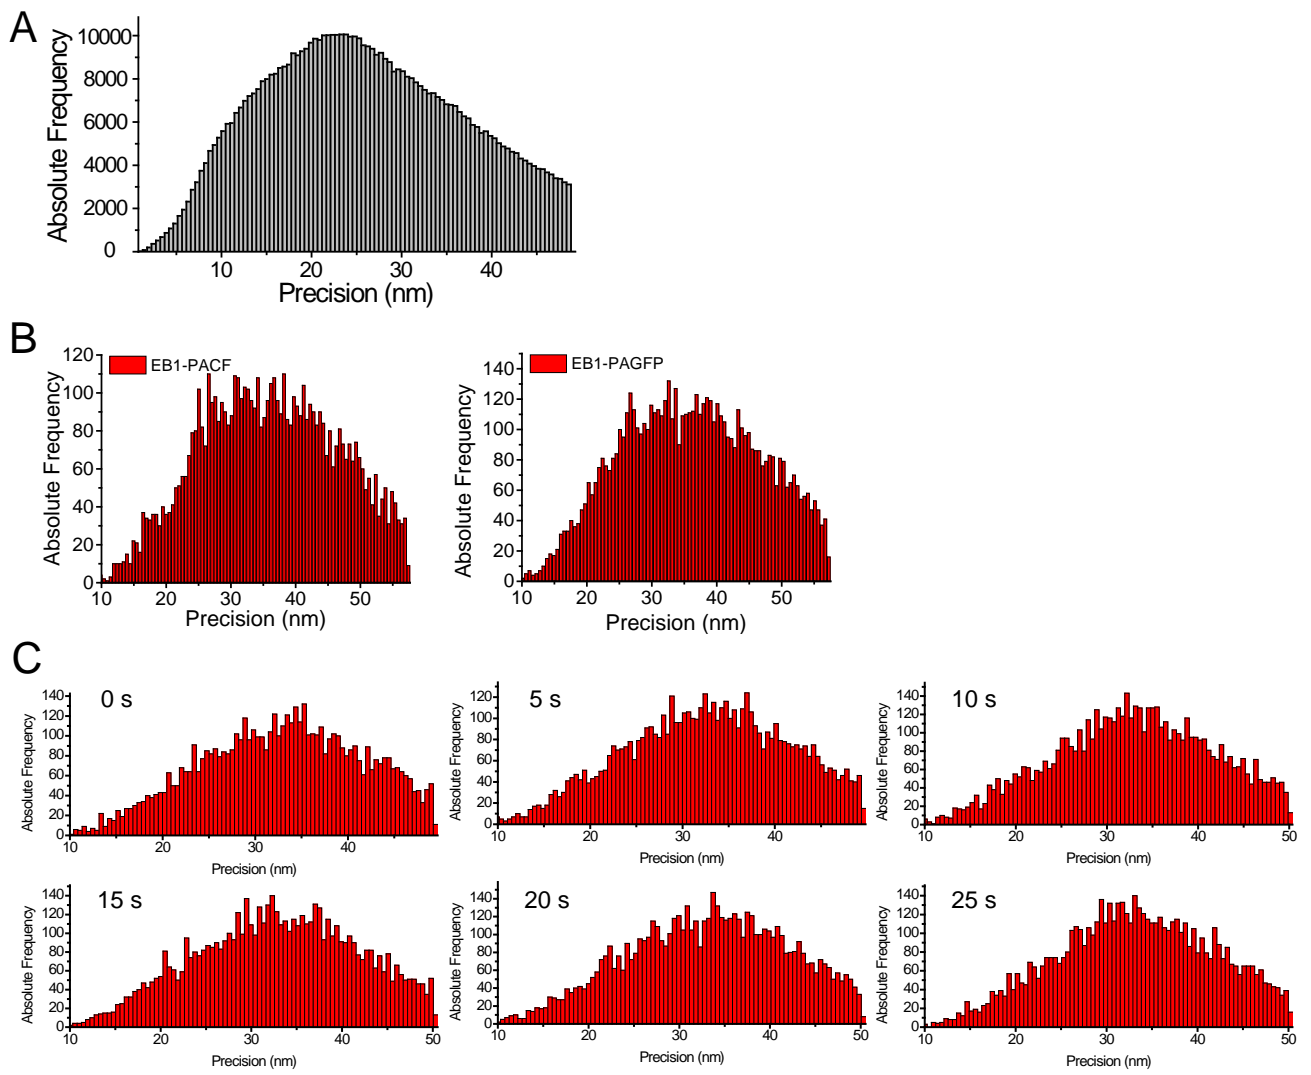

Figure S5

A

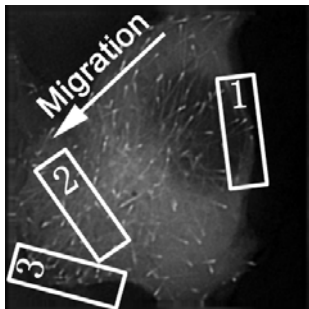

B

1. Trailing Edge

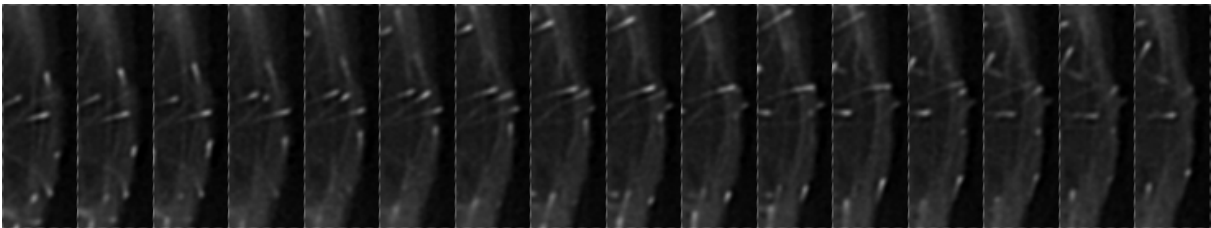

2. Cell Body

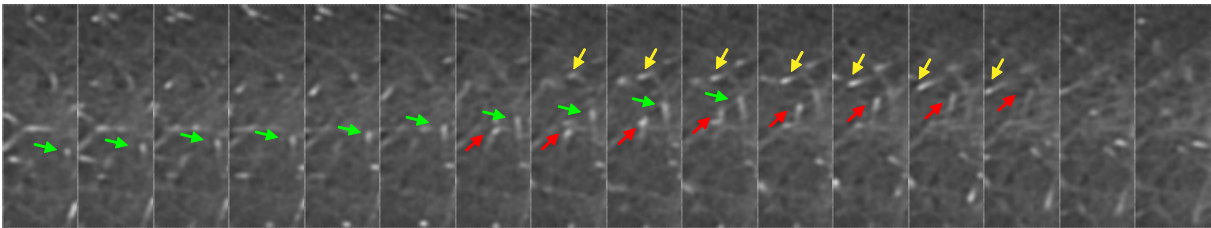

3. Leading Edge

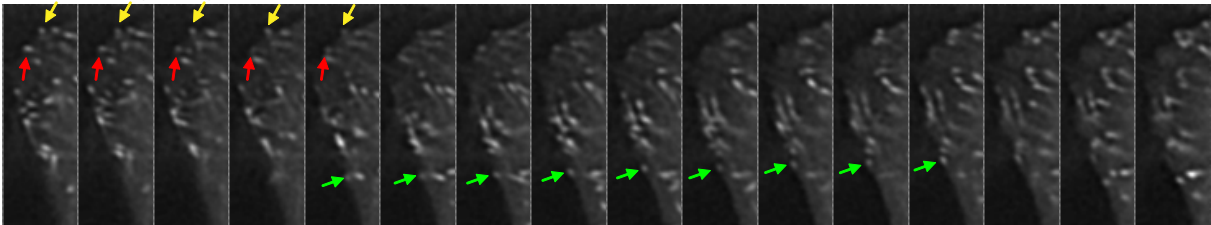

Figure S6

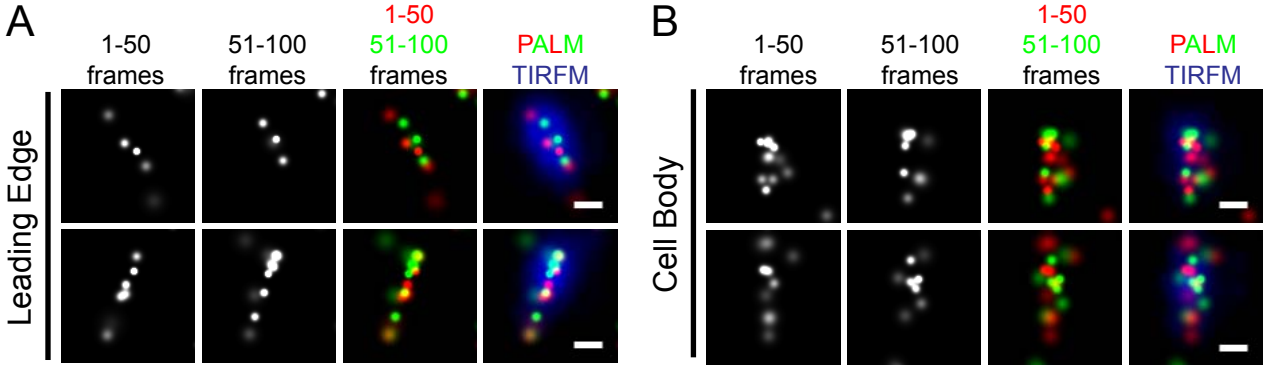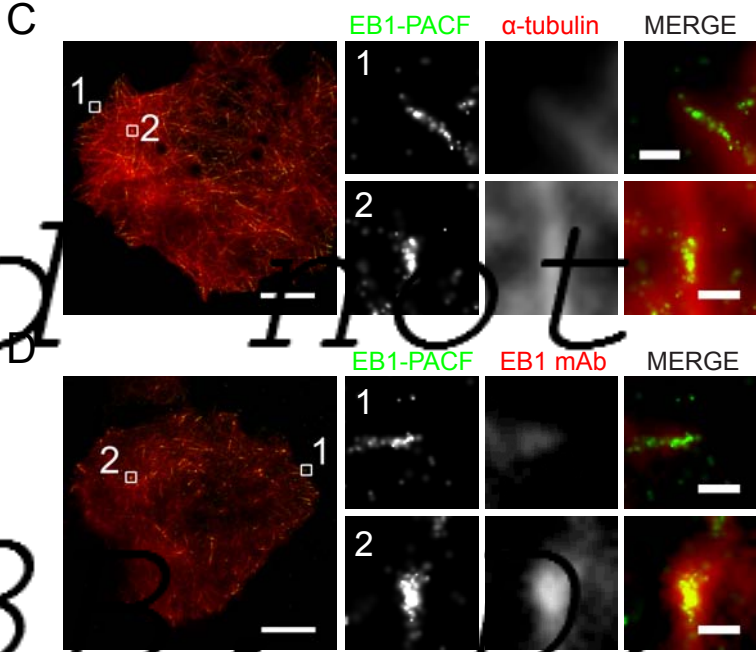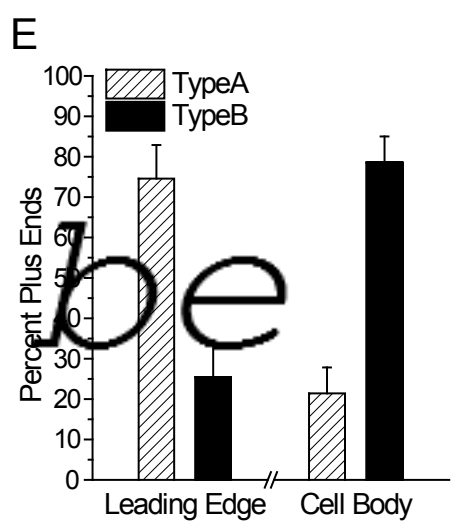

# Figure S7

|     |                                                               |     |           |
|-----|---------------------------------------------------------------|-----|-----------|
| 1   | MAVNVYSTSVTSDNLSRHDMLAWINESLQLNLTKIEQLCSGAAYCQFMDMLFPGSIALKK  | 60  | EB1_HUMAN |
| 1   | MAVNVYSTSVTSDNLSRHDMLAWINESLQLNLTKIEQLCSGAAYCQFMDMLFPGSIALKK  | 60  | EB1_MOUSE |
| 1   | MAVNVYSTSVTSENLSRHDMLAWVNDLHLNLYTKIEQLCSGAAYCQFMDMLFPGCVHLRK  | 60  | EB3_HUMAN |
| 1   | MAVNVYSTSVTSENLSRHDMLAWVNDLHLNLYTKIEQLCSGAAYCQFMDMLFPGCVHLRK  | 60  | EB3_MOUSE |
|     | *****:*****:***:** *****:*****. : **                          |     |           |
| 61  | VKFQAKLEHEYIQNFKILQAGFKRMGVDKIIPVDKLVKGFQDNFEFVQWFKKFFDANYD   | 120 | EB1_HUMAN |
| 61  | VKFQAKLEHEYIQNFKILQAGFKRMGVDKIIPVDKLVKGFQDNFEFVQWFKKFFDANYD   | 120 | EB1_MOUSE |
| 61  | VKFQAKLEHEYIHNFKVLQAAFKKMGVDKIIPEKLVKGFQDNFEFVQWFKKFFDANYD    | 120 | EB3_HUMAN |
| 61  | VKFQAKLEHEYIHNFKVLQAAFKKMGVDKIIPEKLVKGFQDNFEFVQWFKKFFDANYD    | 120 | EB3_MOUSE |
|     | *****:***:**. **:*****:*****:*****:*****                      |     |           |
| 121 | GKDYPVAARQGQETAVAPSLVAPALNKPKKPLTSSSAA---PQRPISTQRTAA-APKAG   | 176 | EB1_HUMAN |
| 121 | GKEYDPVAARQGQETAVAPSLVAPALSKPKKPLGSSATAA---PQRPIATQRTTA-APKAG | 176 | EB1_MOUSE |
| 121 | GKDYNPLLARQGQDVAPPNPGDQIFNKSKKLIGTAVPQRTSPTGPKNMQTSGRLSNVAP   | 180 | EB3_HUMAN |
| 121 | GKDYNPLLARQGQDVAPPNPGDQIFNKSKKLIGTAVPQRTSPTGPKNMQTSGRLSNVAP   | 180 | EB3_MOUSE |
|     | **:*:*: *****: * * . : * ** : : * * * : : *                   |     |           |
| 177 | PGVVRKNPGVG-N---GDDEAAELMQQVNVLKLTVEDLEKERDFYFGKLRNIELICQEN   | 231 | EB1_HUMAN |
| 177 | PGMVRKNPGVG-N---GDDEAAELMQQVKVLKLTVEDLEKERDFYFGKLRNIELICQEN   | 231 | EB1_MOUSE |
| 181 | PCILRKNPPSARNGGHETDAQILELNQQQLVDLKLTVDGLERDFYFSKLRDIELICQEH   | 240 | EB3_HUMAN |
| 181 | PCILRKNPPSARNGGHEADAQILELNQQQLLDLKLTVDGLERDFYFSKLRDIELICQEH   | 240 | EB3_MOUSE |
|     | * :***** . * * : ** **: *****: *****. **:******.              |     |           |
| 232 | EGENDPVLQRIVDILYATDEGFVIPDEGGPQEEQ----EEY                     | 268 | EB1_HUMAN |
| 232 | EGENDPVLQRIVDILYATDEGFVIPDEGGPQEEQ----EEY                     | 268 | EB1_MOUSE |
| 241 | ESENSPVISGIIGILYATEEGFAPPEDEIEEHQQEDQDEY                      | 281 | EB3_HUMAN |
| 241 | ESENSPVISGIIGILYATEEGFAPPEDEIEEHQQEDQDEY                      | 281 | EB3_MOUSE |
|     | *. ** . ** : * : *****:***. **: :*.* :**                      |     |           |

Figure S8

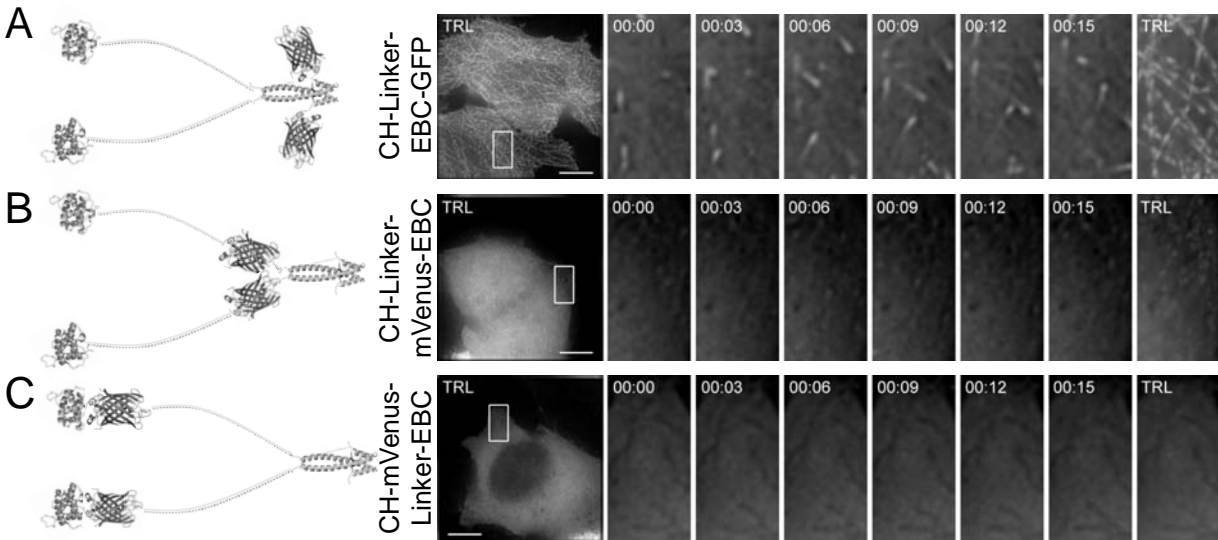

Figure S9

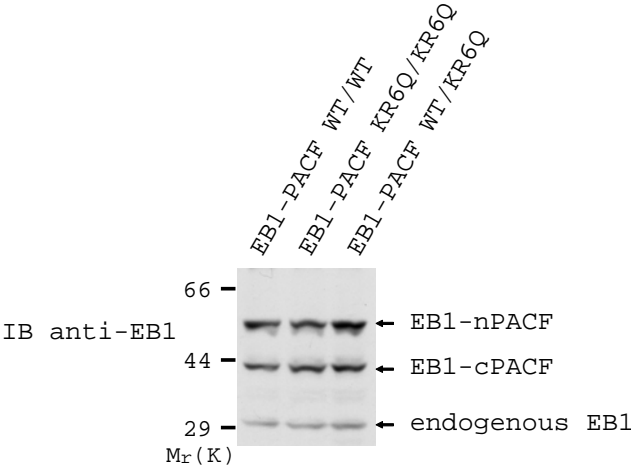

Figure S10

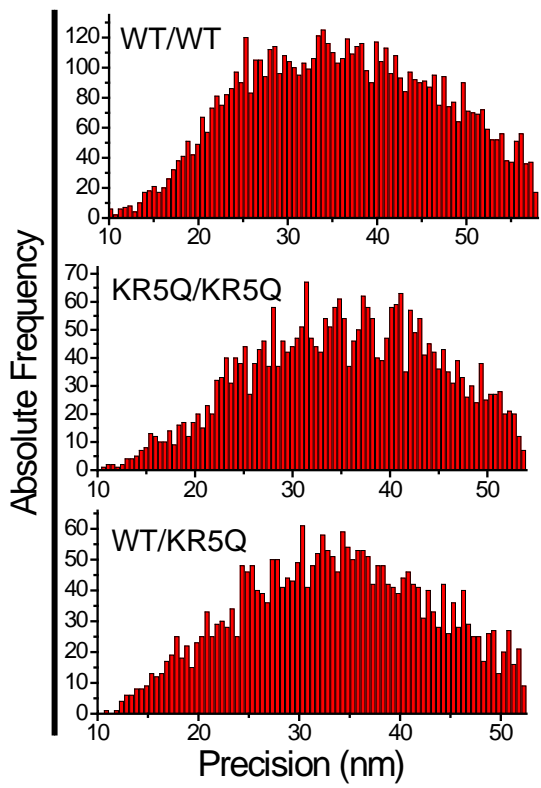

Figure S11

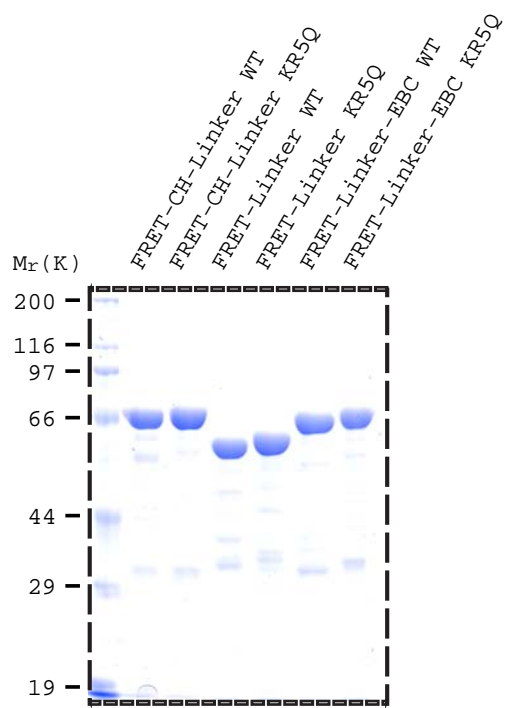



Figure S12

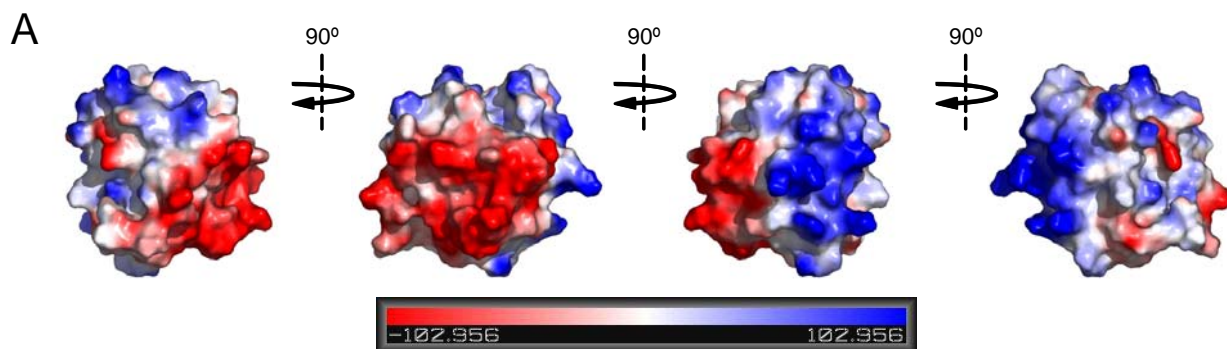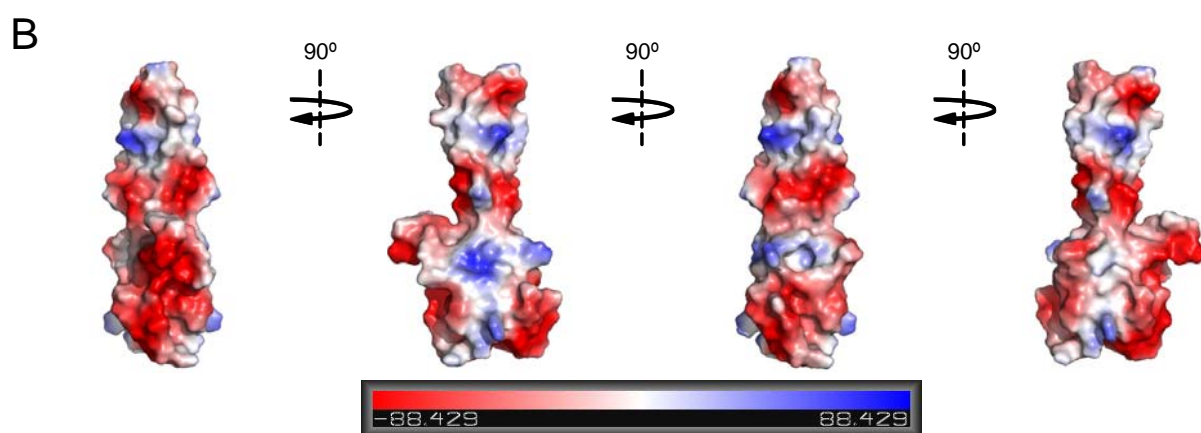

Supplement: supp_E14-06-1133v1_CombinedSupMats.pdf [file supp_E14-06-1133v1_CombinedSupMats.pdf]
